# Supplementary material
Source: Springer Nature journal article supplement (https://www.springermedizin.de/resource/supplementary/12943_2010_788_MOESM2_ESM.pdf/9554824)

A)

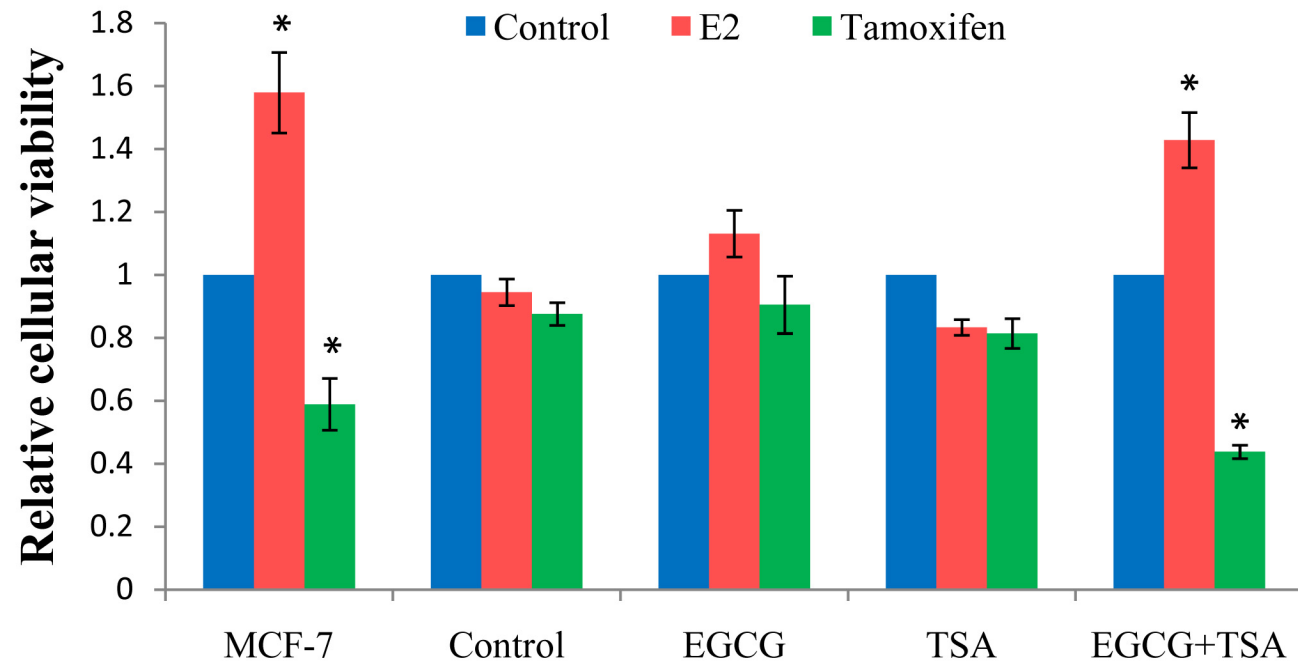

MDA-MB-231

B)

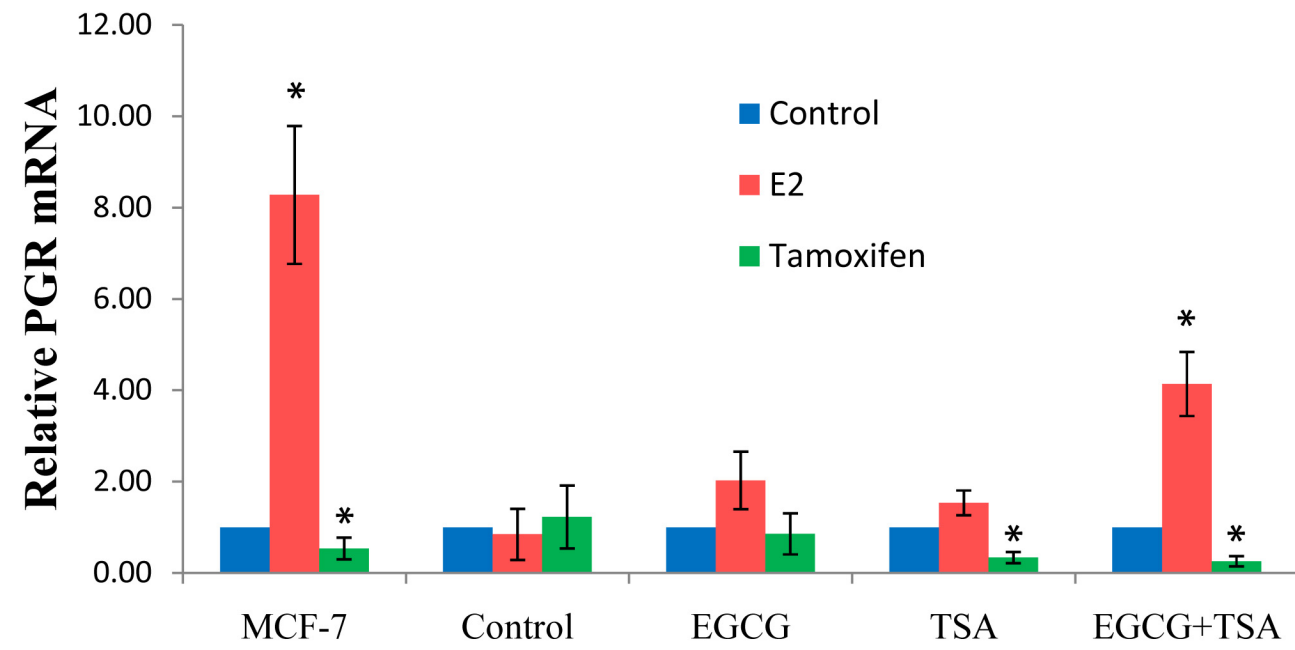

MDA-MB-231

Supplement: MOESM2 [file 9554824]
